# Supplementary material for: From the Design to the In Vivo Evaluation of Benzohomoadamantane-Derived Soluble Epoxide Hydrolase Inhibitors for the Treatment of Acute Pancreatitis
Source: PubMed Central journal article supplement (PMC8634379; doi:10.1021/acs.jmedchem.0c01601), 2021-05-04
Supplement: jm0c01601_si_001.pdf [file jm0c01601_si_001.pdf]

## ***SUPPORTING INFORMATION FOR***

From the design to the *in vivo* evaluation of  
benzohomoadamantane-derived soluble epoxide  
hydrolase inhibitors for the treatment of acute  
pancreatitis

*Sandra Codony<sup>1</sup>, Carla Calvó-Tusell<sup>2</sup>, Elena Valverde<sup>1</sup>, Silvia Osuna<sup>2,3</sup>, Christophe  
Morisseau<sup>4</sup>, M. Isabel Loza<sup>5</sup>, José Brea<sup>5</sup>, Concepción Pérez<sup>6</sup>, María Isabel Rodríguez-  
Franco<sup>6</sup>, Javier Pizarro-Delgado<sup>7,8,9</sup>, Rubén Corpas<sup>10,11</sup>, Christian Griñán-Ferré<sup>12</sup>,  
Mercè Pallàs<sup>12</sup>, Coral Sanfeliu<sup>10,11</sup>, Manuel Vázquez-Carrera<sup>7,8,9</sup>, Bruce D. Hammock<sup>4</sup>,  
Ferran Feixas<sup>2</sup>, Santiago Vázquez<sup>1\*</sup>*

<sup>1</sup>Laboratori de Química Farmacèutica (Unitat Associada al CSIC), Departament de Farmacologia, Toxicologia i Química Terapèutica, Facultat de Farmàcia i Ciències de l'Alimentació, and Institute of Biomedicine (IBUB), Universitat de Barcelona, Av. Joan XXIII, 27-31, 08028 Barcelona, Spain.

<sup>2</sup>CompBioLab Group, Departament de Química and Institut de Química Computacional i Catàlisi (IQCC), Universitat de Girona, C/ Maria Aurèlia Capmany 69, 17003 Girona, Spain.

<sup>3</sup>Institució Catalana de Recerca i Estudis Avançats (ICREA), 08010 Barcelona, Spain.

<sup>4</sup>Department of Entomology and Nematology and Comprehensive Cancer Center, University of California, Davis, CA 95616, USA.

<sup>5</sup>Drug Screening Platform/Biofarma Research Group, CIMUS Research Center. Departamento de Farmacología, Farmacia e Tecnología Farmacéutica. University of Santiago de Compostela (USC), 15782 Santiago de Compostela, Spain.

<sup>6</sup>Institute of Medicinal Chemistry, Spanish National Research Council (CSIC), C/Juan de la Cierva 3, 28006 Madrid, Spain.

<sup>7</sup>Pharmacology Section. Department of Pharmacology, Toxicology and Medicinal Chemistry, Faculty of Pharmacy and Food Sciences, University of Barcelona, and Institute of Biomedicine of the University of Barcelona (IBUB), Av. Joan XXIII, 27-31, 08028 Barcelona, Spain.

<sup>8</sup>Spanish Biomedical Research Center in Diabetes and Associated Metabolic Diseases (CIBERDEM)-Instituto de Salud Carlos III, 28029 Madrid, Spain.

<sup>9</sup>Pediatric Research Institute-Hospital Sant Joan de Déu, 08950 Esplugues de Llobregat, Spain.

<sup>10</sup>Institute of Biomedical Research of Barcelona (IIBB), CSIC and IDIBAPS, 08036 Barcelona, Spain.

<sup>11</sup>CIBER Epidemiology and Public Health (CIBERESP)-Instituto de Salud Carlos III, 28029, Madrid, Spain.

<sup>12</sup>Pharmacology Section. Department of Pharmacology, Toxicology and Medicinal Chemistry, Faculty of Pharmacy and Food Sciences, and Institut de Neurociències, University of Barcelona, Av. Joan XXIII, 27-31, 08028 Barcelona, Spain.

\* Corresponding author. Tel.: +34 934024533; *E-mail address*: [svazquez@ub.edu](mailto:svazquez@ub.edu) (*S. Vázquez*).

## Table of contents

|                                                                                                                             |          |
|-----------------------------------------------------------------------------------------------------------------------------|----------|
| <sup>1</sup> H and <sup>13</sup> C NMR spectra of compound <b>9</b>                                                         | Page S6  |
| <sup>1</sup> H and <sup>13</sup> C NMR spectra of compound <b>11</b>                                                        | Page S7  |
| <sup>1</sup> H and <sup>13</sup> C NMR spectra of compound <b>13</b>                                                        | Page S8  |
| <sup>1</sup> H and <sup>13</sup> C NMR spectra of compound <b>14</b>                                                        | Page S9  |
| <sup>1</sup> H and <sup>13</sup> C NMR spectra of compound <b>16</b>                                                        | Page S10 |
| <sup>1</sup> H and <sup>13</sup> C NMR spectra of compound <b>17</b>                                                        | Page S11 |
| <sup>1</sup> H and <sup>13</sup> C NMR spectra of compound <b>18</b>                                                        | Page S12 |
| <sup>1</sup> H and <sup>13</sup> C NMR spectra of compound <b>20</b>                                                        | Page S13 |
| <sup>1</sup> H and <sup>13</sup> C NMR spectra of compound <b>21</b>                                                        | Page S14 |
| <sup>1</sup> H and <sup>13</sup> C NMR spectra of compound <b>22</b>                                                        | Page S15 |
| <sup>1</sup> H and <sup>13</sup> C NMR spectra of compound <b>23</b>                                                        | Page S16 |
| Table S1: Elemental analysis data                                                                                           | Page S17 |
| HPLC trace for compound <b>22</b>                                                                                           | Page S18 |
| Figure S1: Active site volume fluctuations                                                                                  | Page S19 |
| Figure S2: Root-mean-square fluctuation of the C-terminal region of sEH                                                     | Page S20 |
| Figure S3: Non-covalent interactions between the inhibitors and the active site residues of sEH                             | Page S21 |
| Figure S4: Analysis of active site water molecules in MD simulations                                                        | Page S22 |
| Figure S5: Water occupation in the sEH active site and water distribution for compounds <b>20</b> , <b>22</b> and <b>23</b> | Page S23 |
| Figure S6: Rotation of the benzohomoadamantane and adamantane moieties in the pocket of the sEH active site                 | Page S24 |
| Figure S7: Apo state aMD simulations with compounds <i>t</i> -AUCB, <b>20</b> , <b>22</b> and <b>23</b>                     | Page S25 |
| Table S2: Mean of concentrations of <b>20</b> in mouse plasma                                                               | Page S26 |
| Table S3: Mean of concentrations of <b>22</b> in mouse plasma                                                               | Page S27 |
| Figure S8: Concentrations of <b>20</b> in mouse plasma after ip administration                                              | Page S28 |

|                                                                                                             |          |
|-------------------------------------------------------------------------------------------------------------|----------|
| Figure S9: Concentrations of <b>22</b> in mouse plasma after ip administration                              | Page S28 |
| Table S4: Histologic scoring of pancreatic tissues of control group                                         | Page S29 |
| Table S5: Histologic scoring of pancreatic tissues of mice treated with cerulein                            | Page S29 |
| Table S6: Histologic scoring of pancreatic tissues of mice treated with cerulein and <b>22</b> at 0.1 mg/kg | Page S29 |
| Table S7: Histologic scoring of pancreatic tissues of mice treated with cerulein and <b>22</b> at 0.3 mg/kg | Page S29 |
| References                                                                                                  | Page S30 |

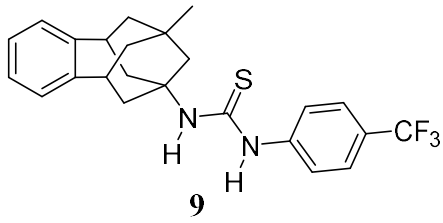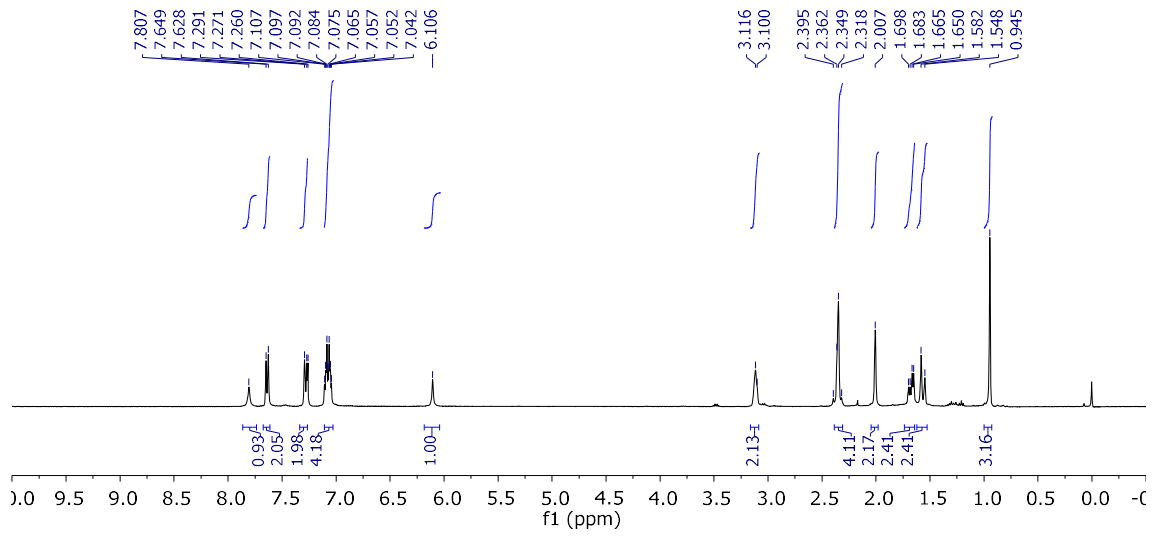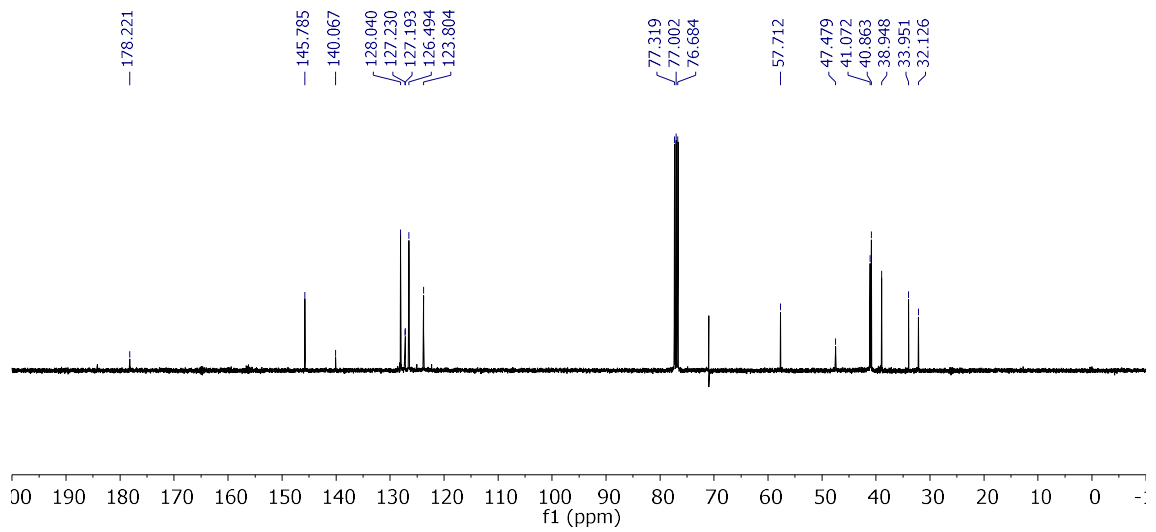

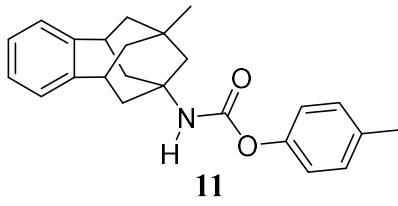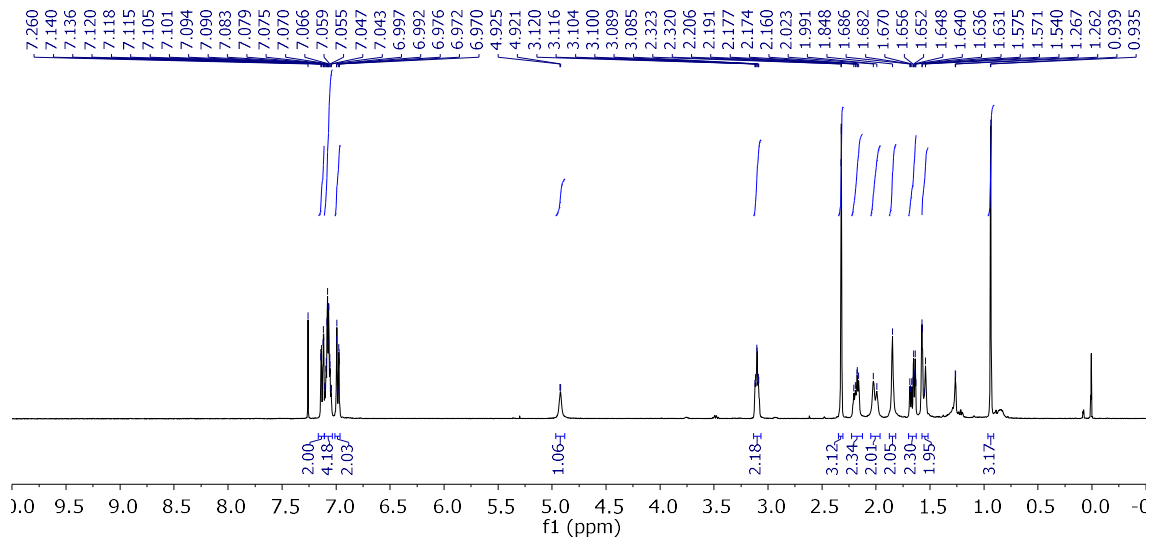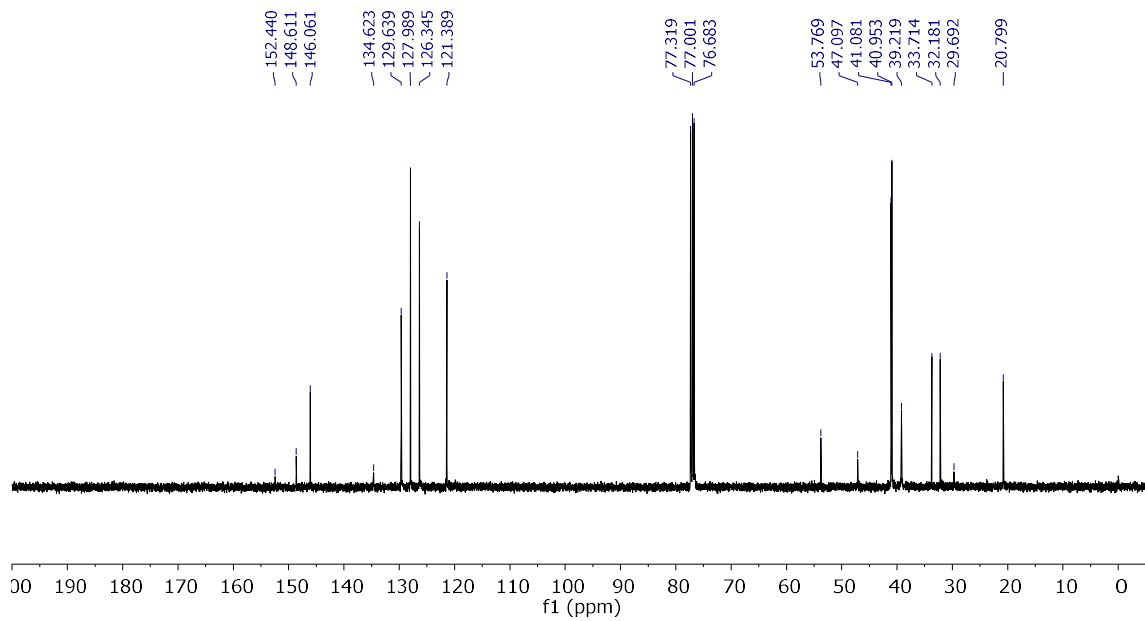

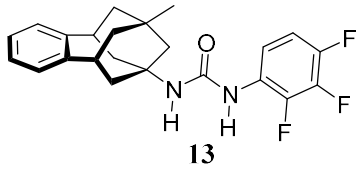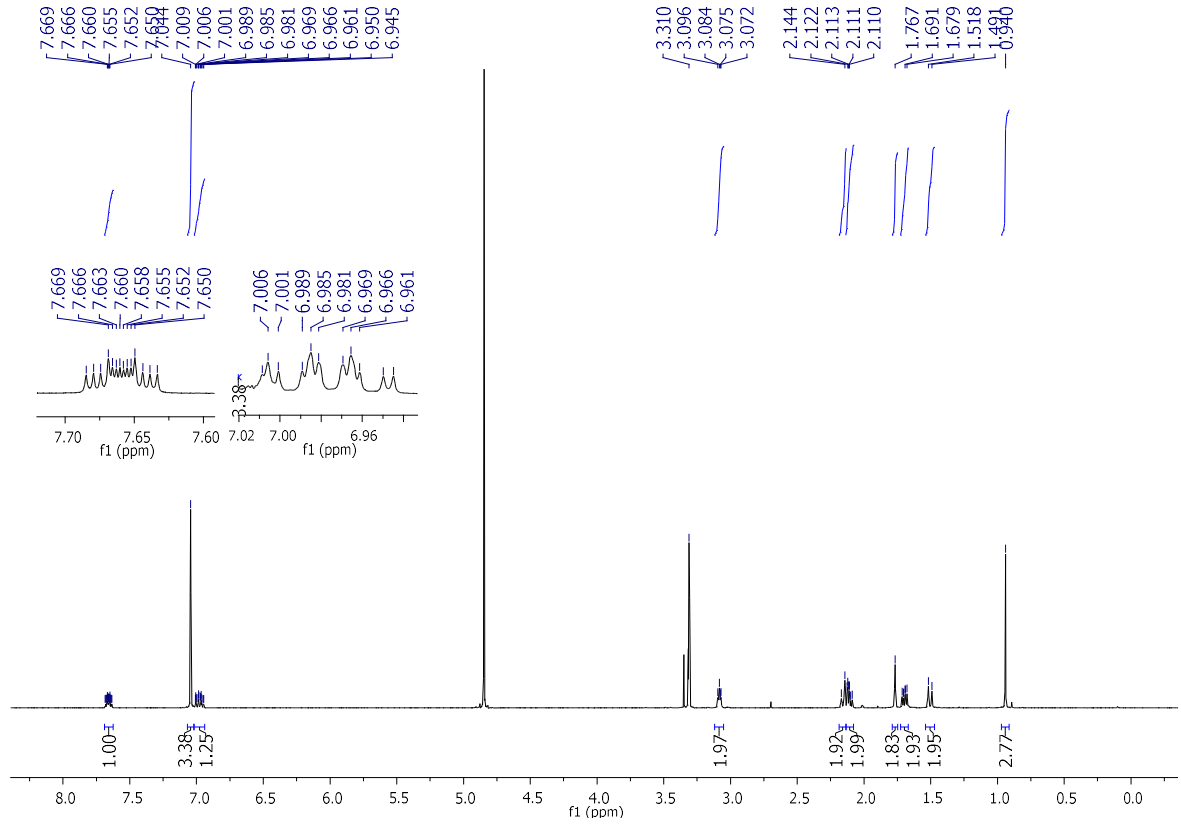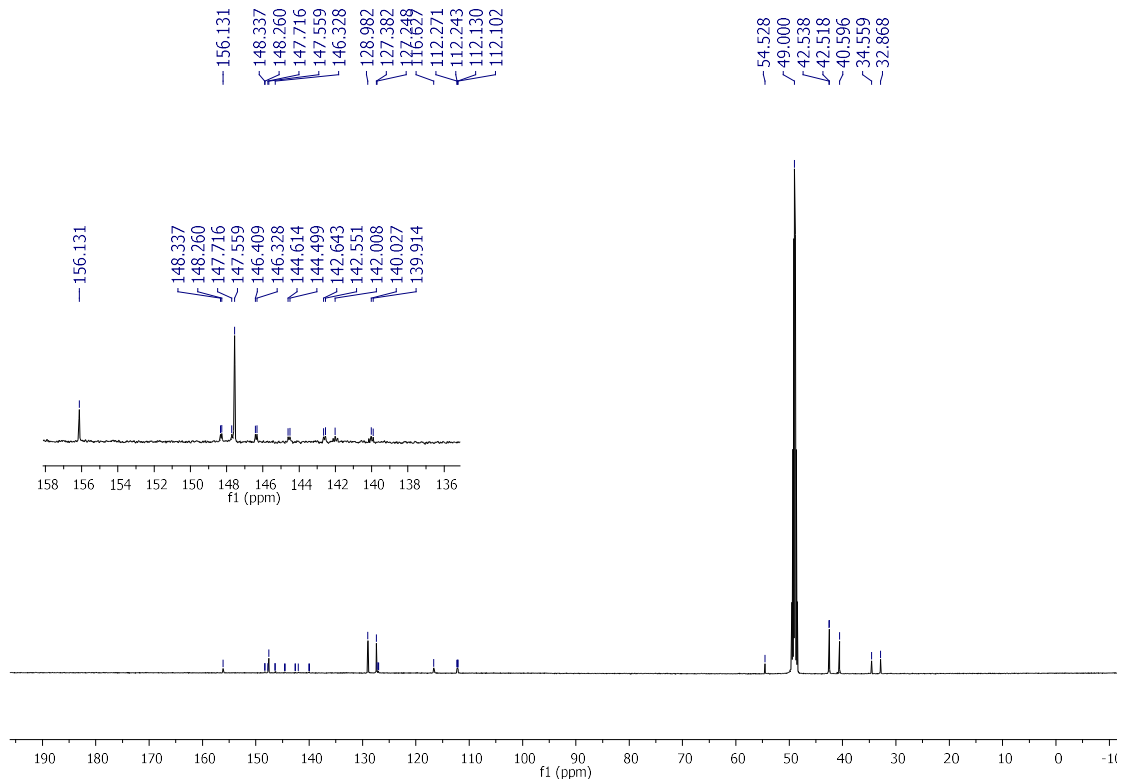



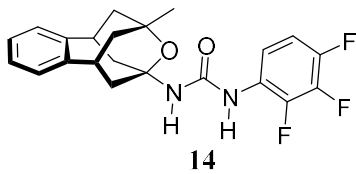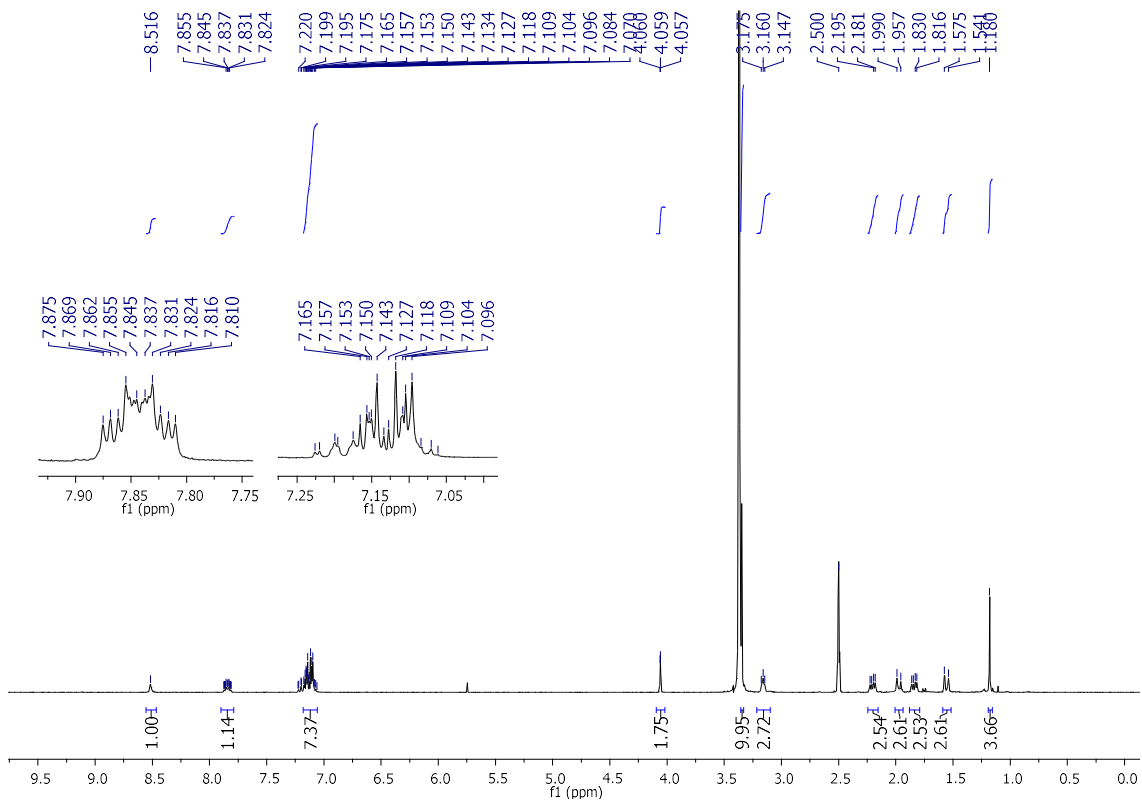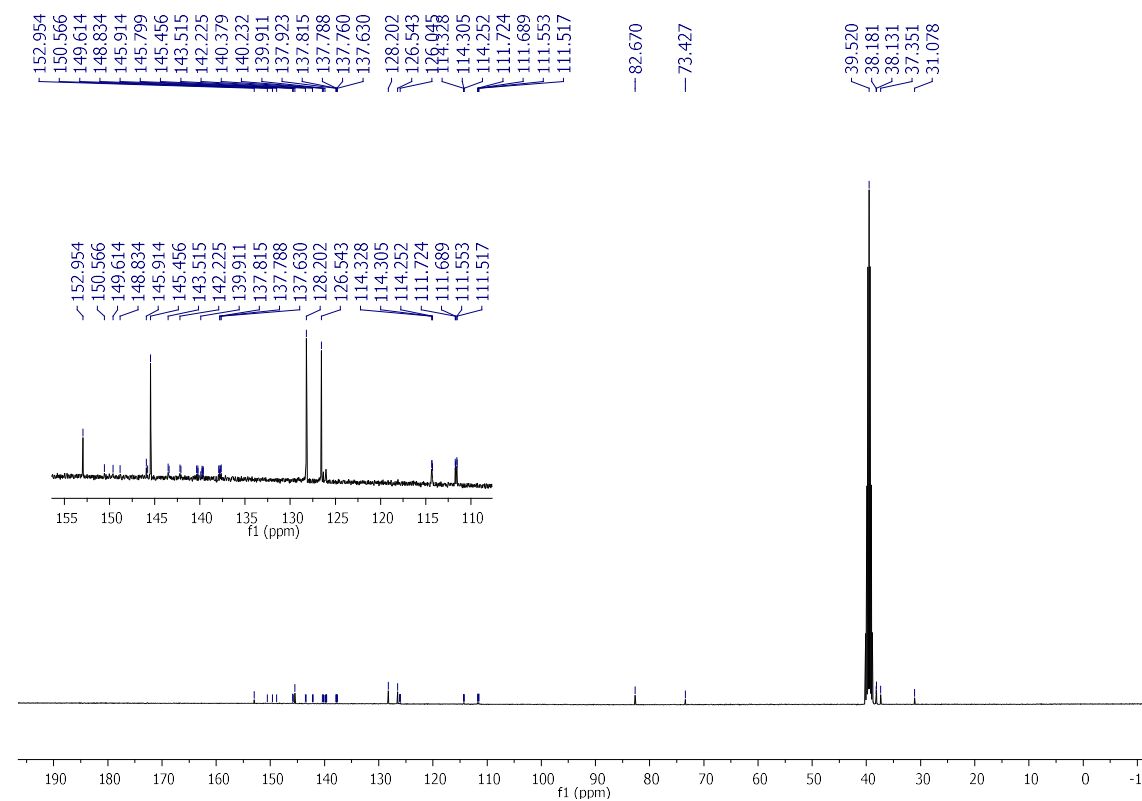

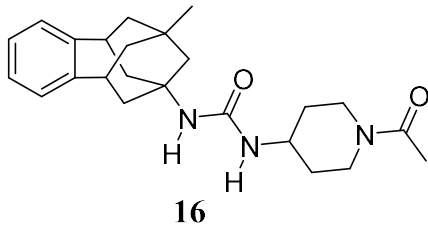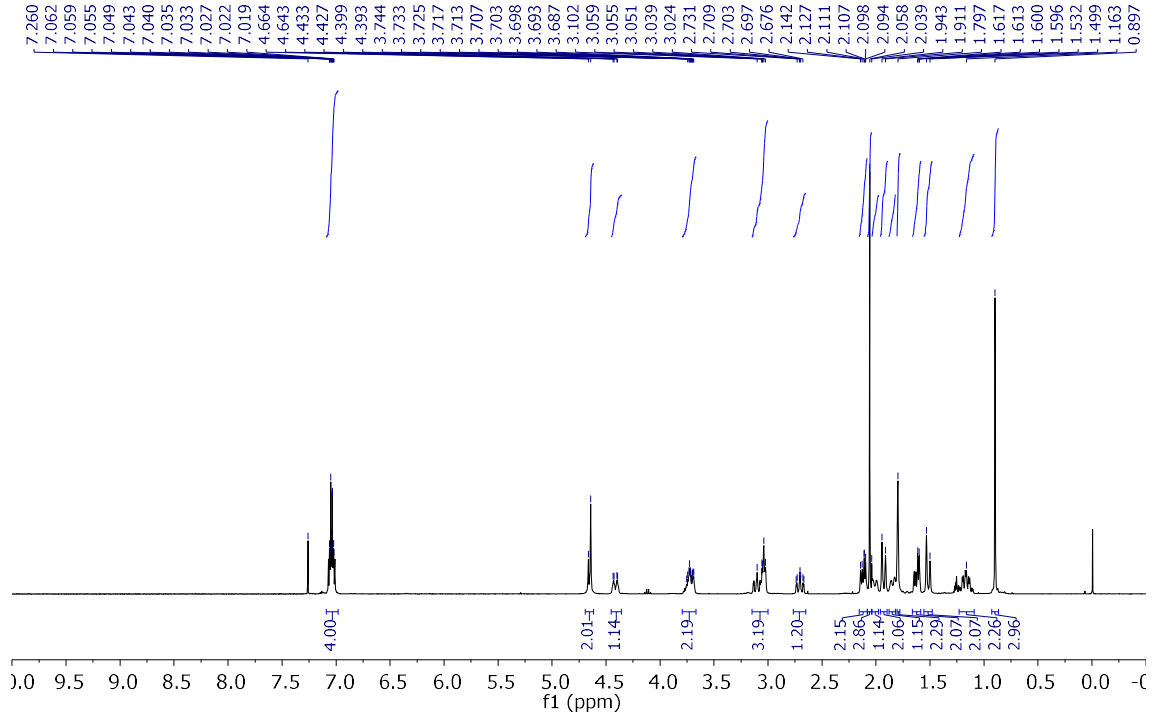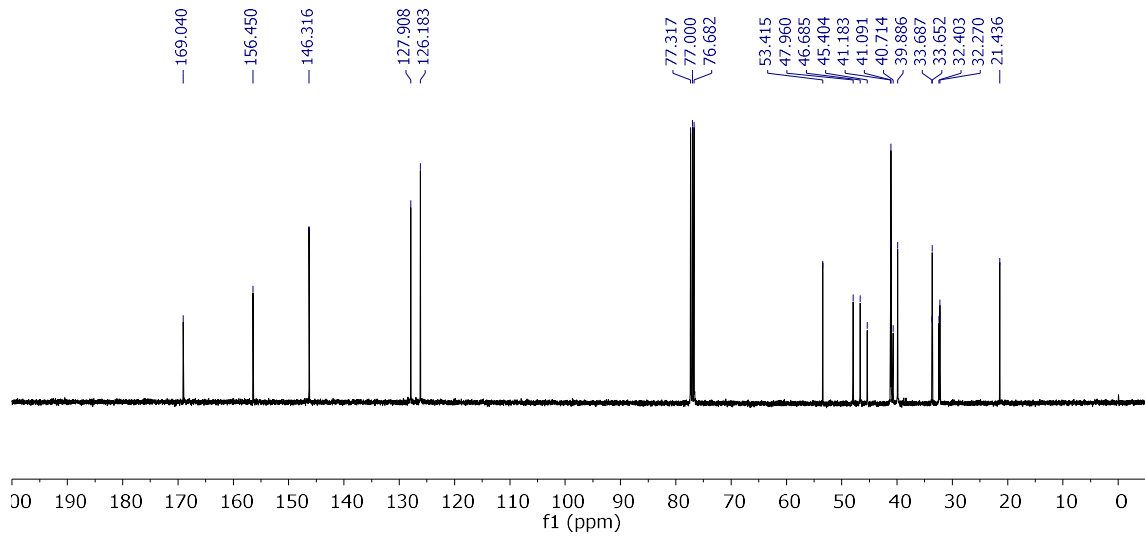

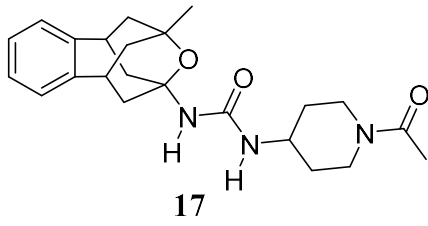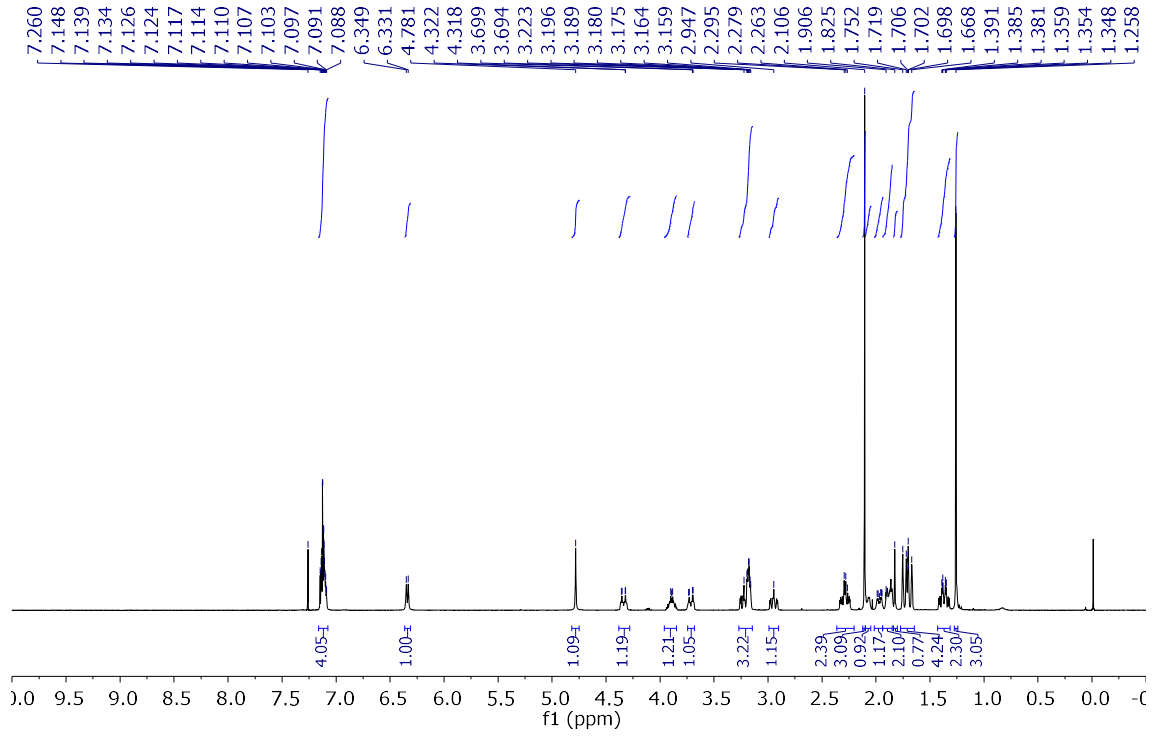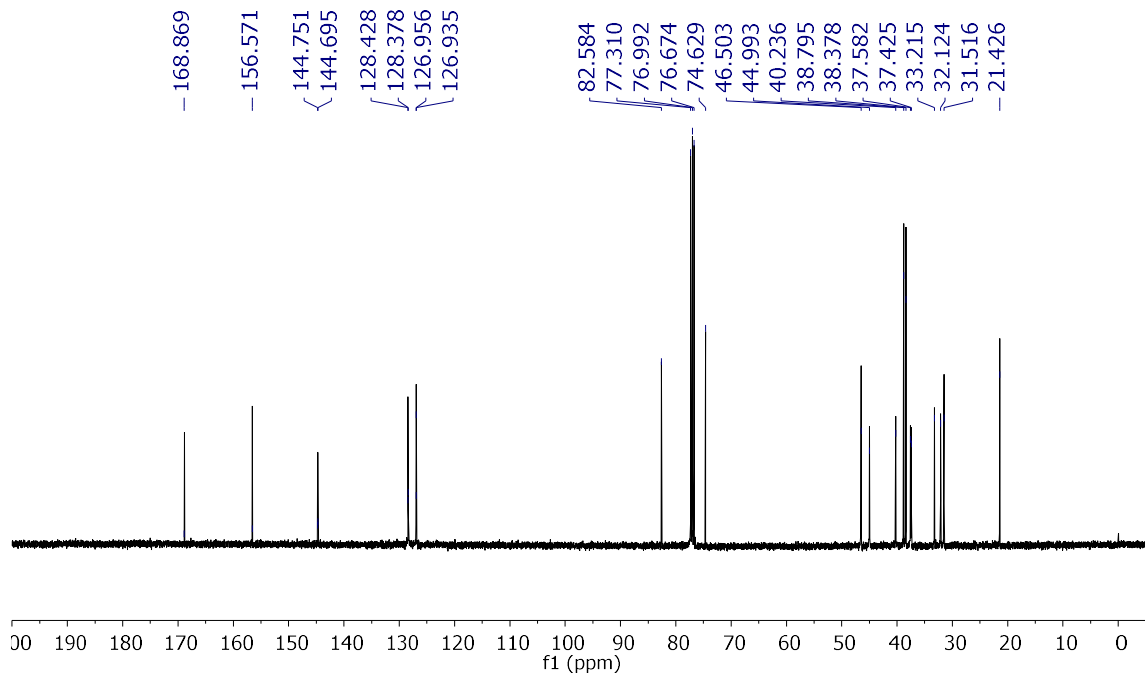

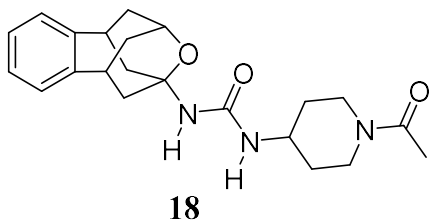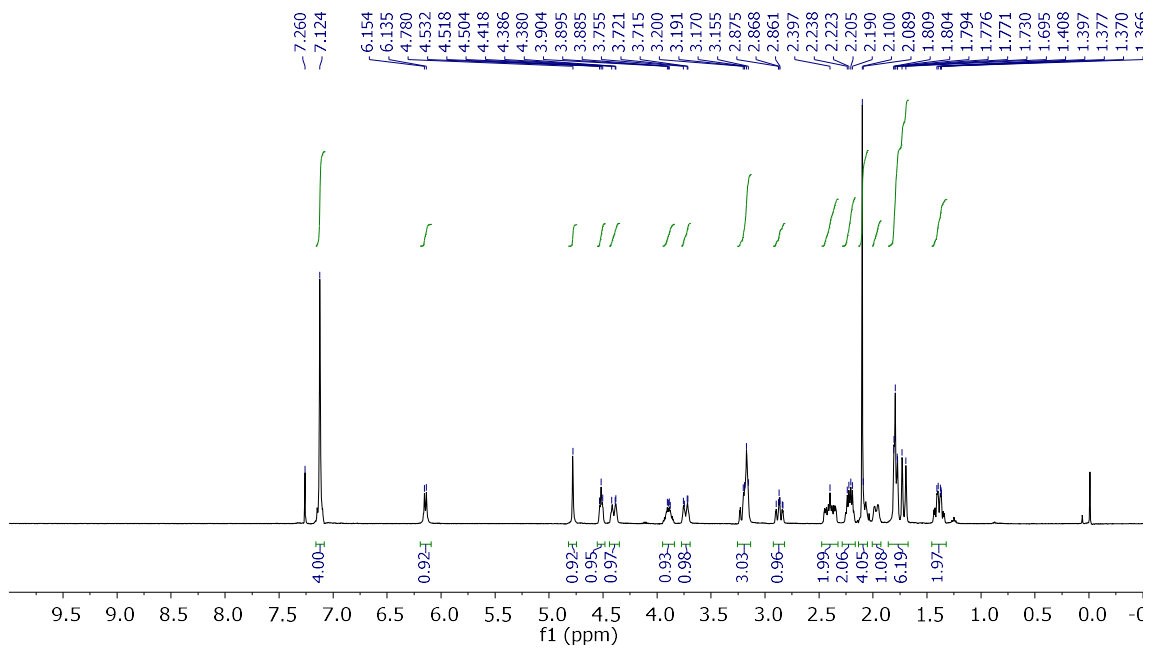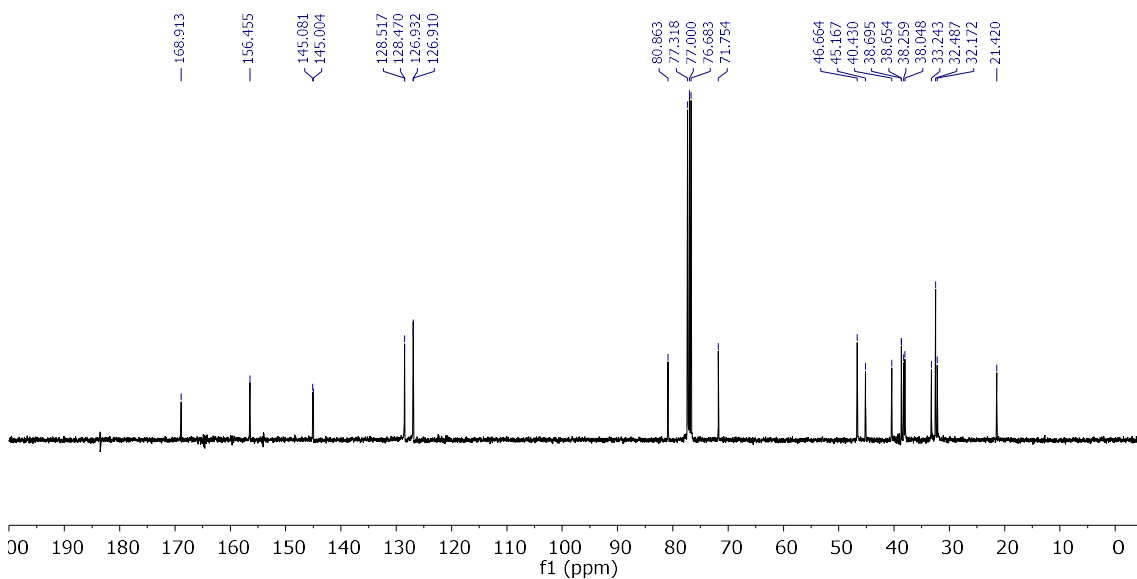

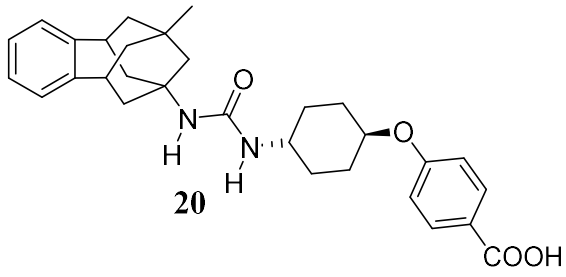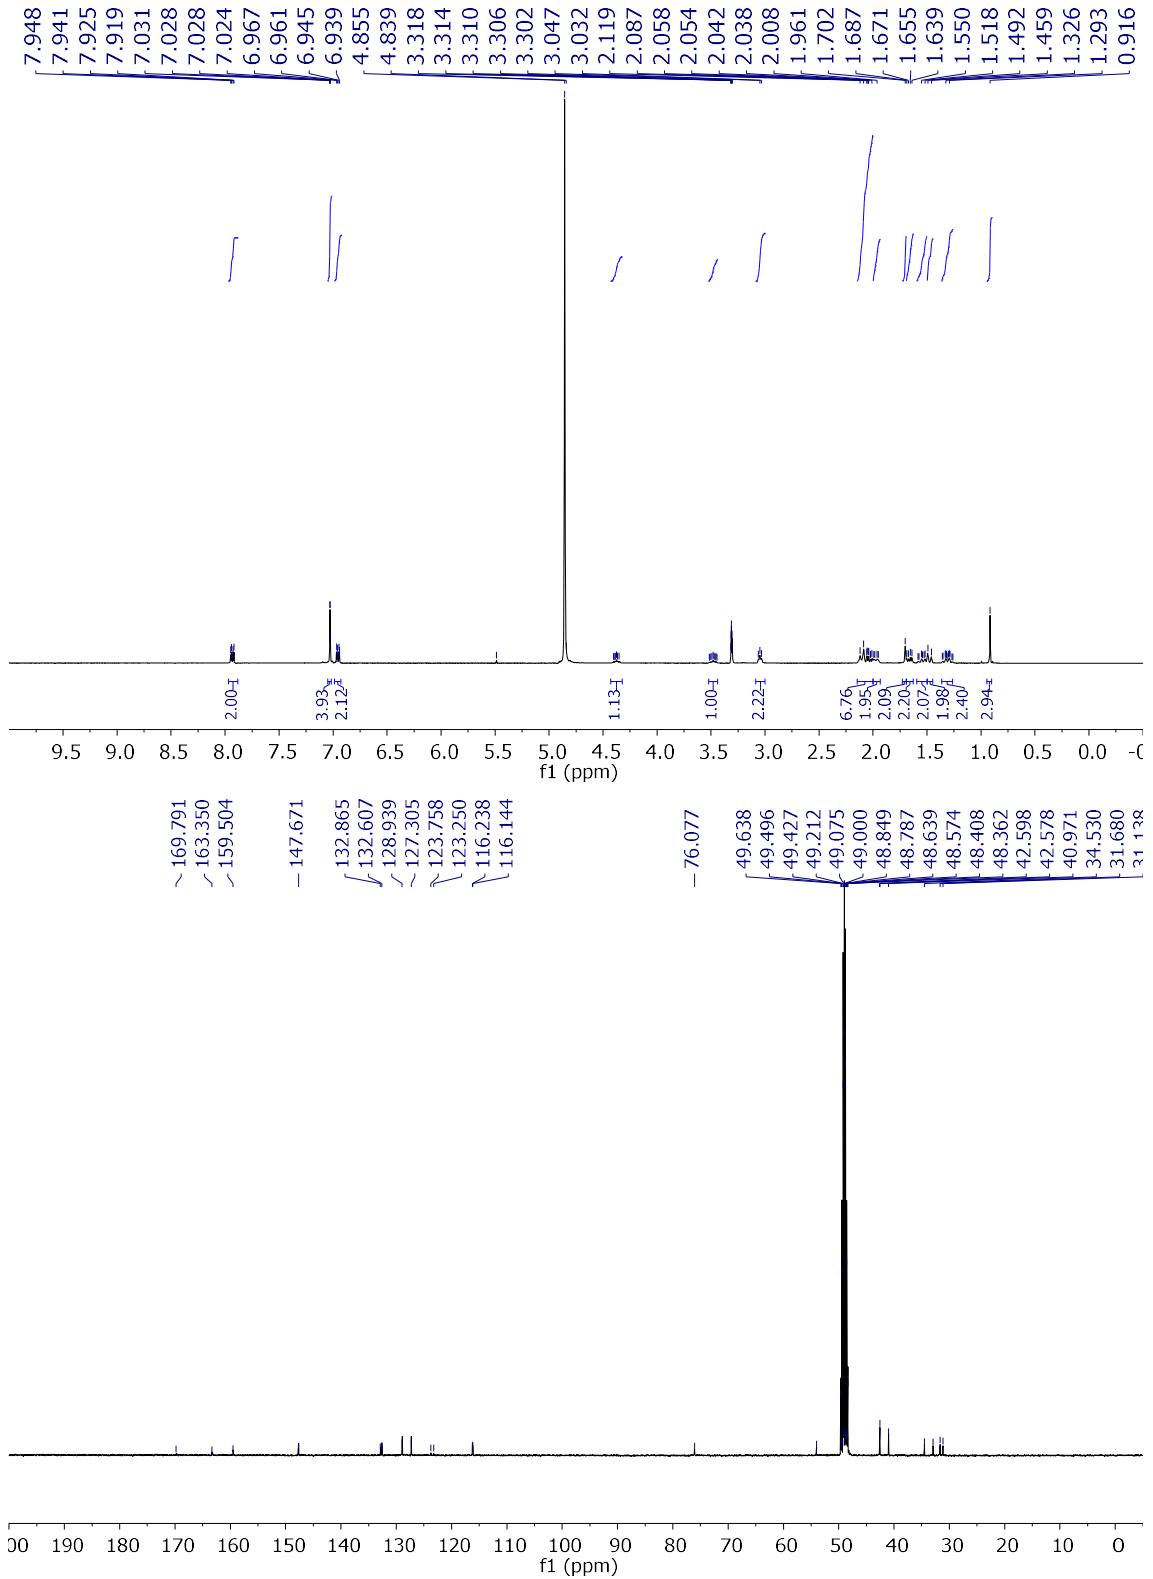

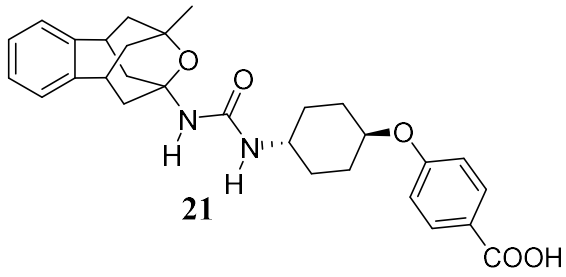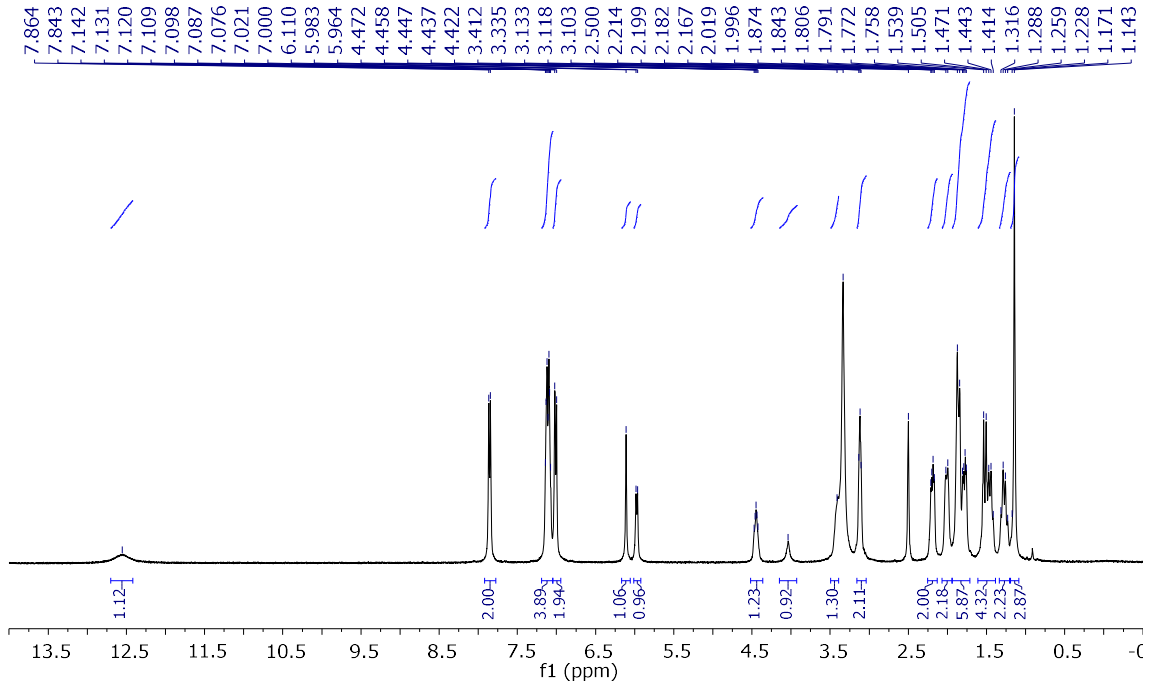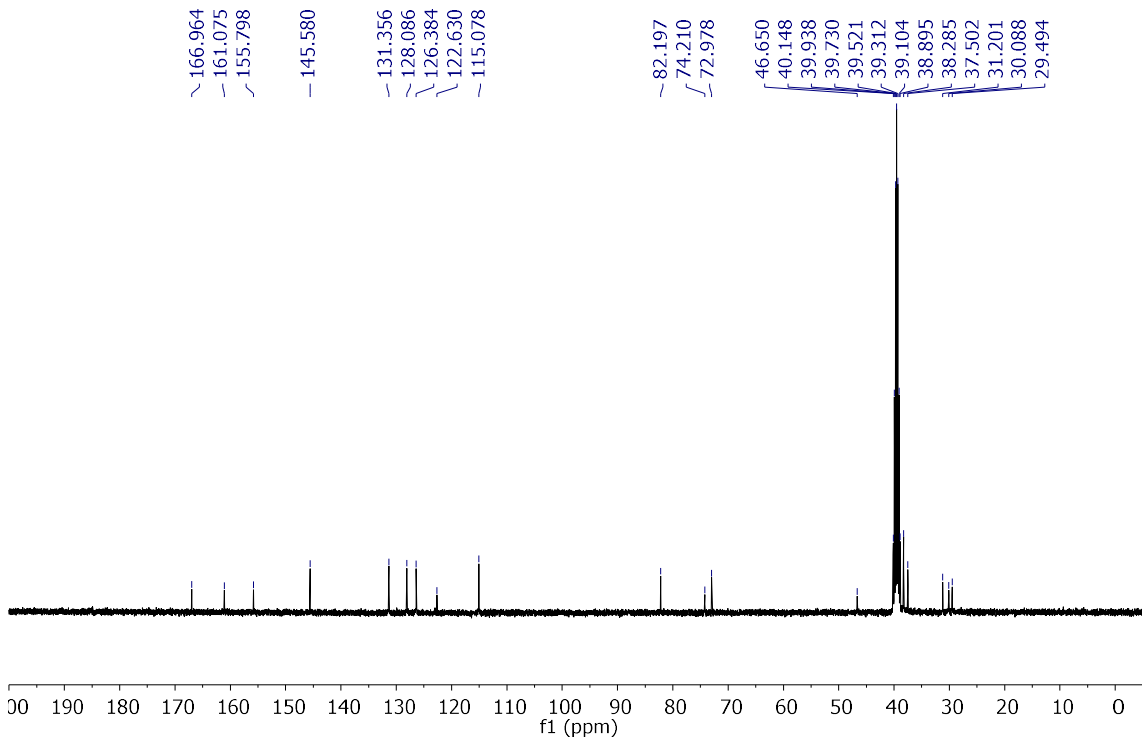

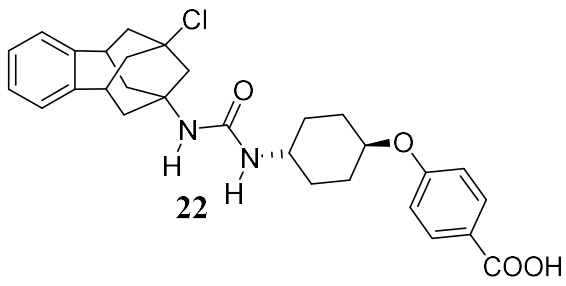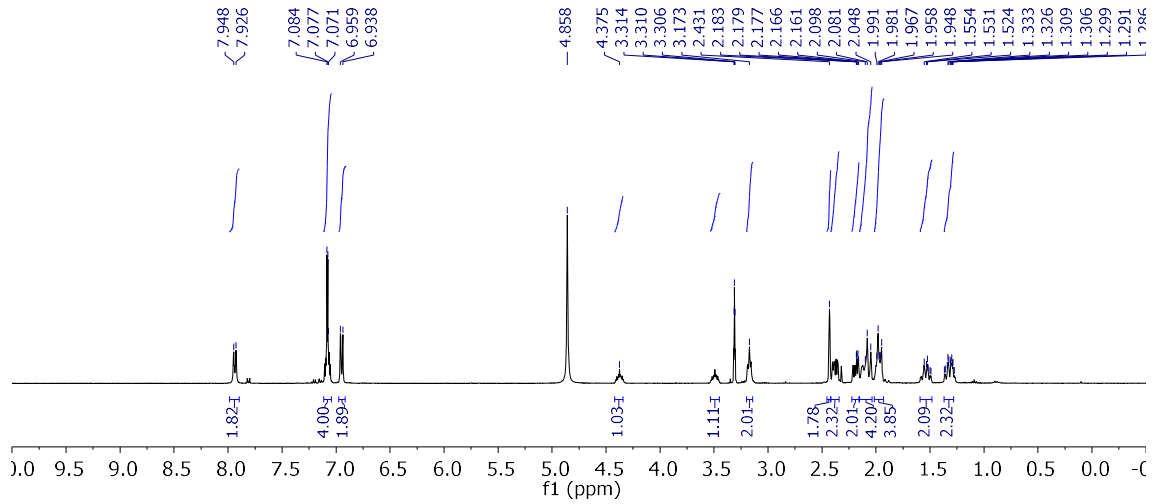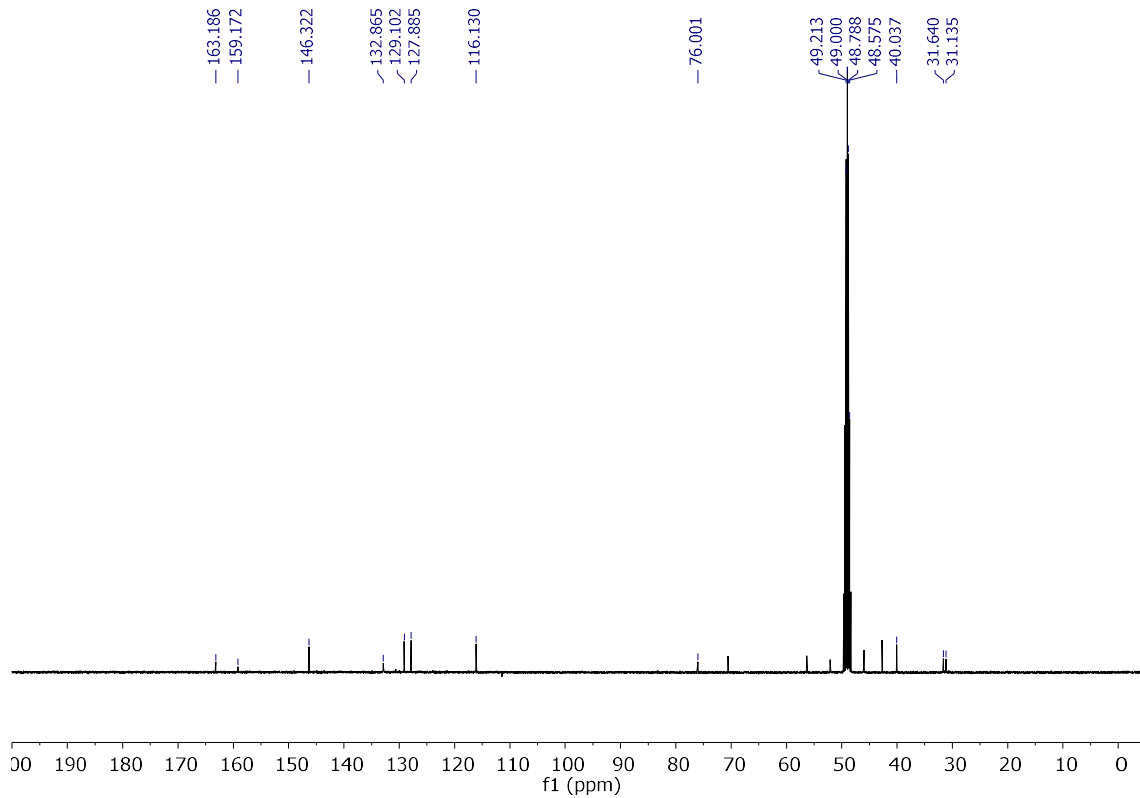

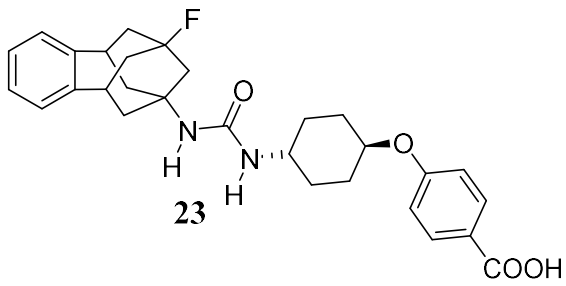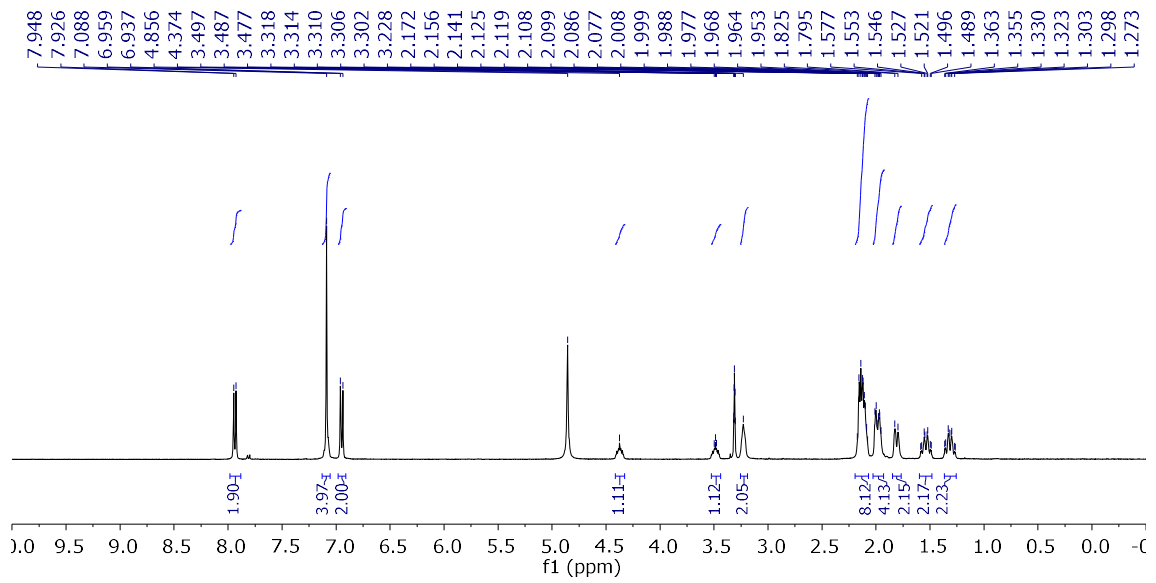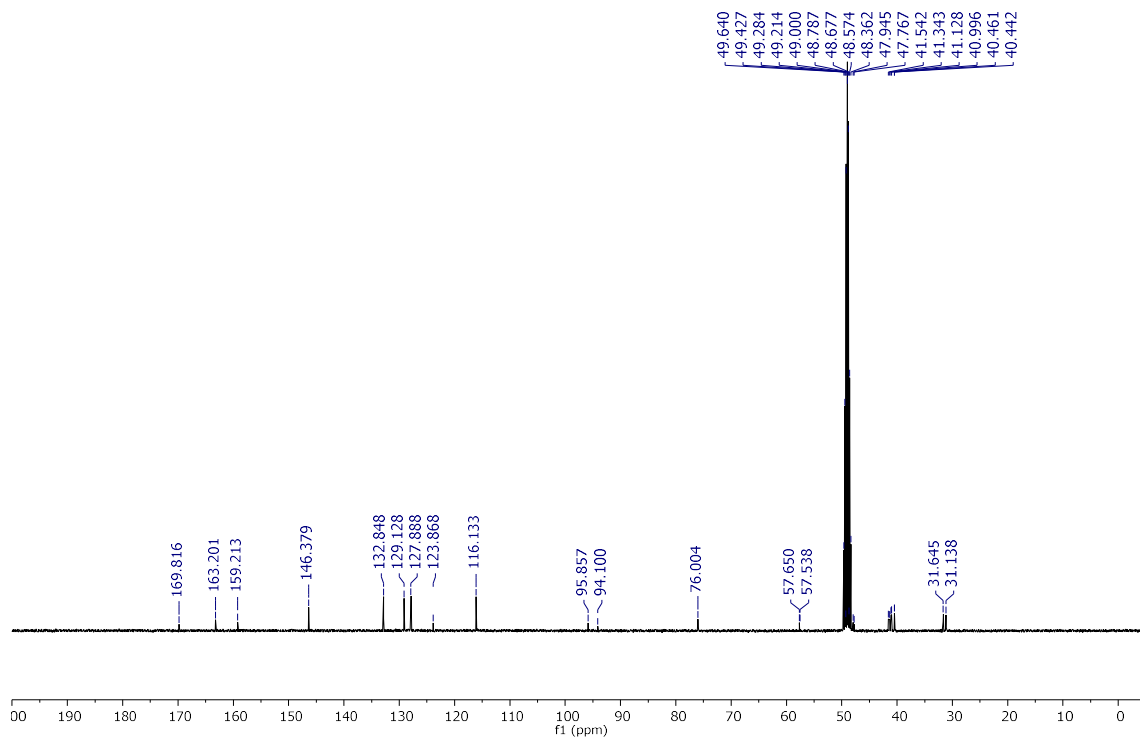



| Compound  | Molecular Formula                                                                                   | Calculated |      |       | Found |      |       |
|-----------|-----------------------------------------------------------------------------------------------------|------------|------|-------|-------|------|-------|
|           |                                                                                                     | C          | H    | N     | C     | H    | N     |
| <b>9</b>  | C <sub>24</sub> H <sub>25</sub> F <sub>3</sub> N <sub>2</sub> S                                     | 66.96      | 5.85 | 6.51  | 66.79 | 5.95 | 6.37  |
| <b>11</b> | C <sub>24</sub> H <sub>27</sub> NO <sub>2</sub> · 0.15 H <sub>2</sub> O                             | 79.15      | 7.56 | 3.85  | 79.34 | 7.92 | 3.48  |
| <b>13</b> | C <sub>23</sub> H <sub>23</sub> F <sub>3</sub> N <sub>2</sub> O                                     | 68.99      | 5.79 | 7.00  | 68.94 | 5.92 | 6.71  |
| <b>14</b> | C <sub>22</sub> H <sub>21</sub> F <sub>3</sub> N <sub>2</sub> O <sub>2</sub> · 0.1 H <sub>2</sub> O | 65.37      | 5.29 | 6.93  | 65.18 | 5.31 | 6.73  |
| <b>16</b> | C <sub>24</sub> H <sub>33</sub> N <sub>3</sub> O <sub>2</sub> · 0.25 EtOAc                          | 71.91      | 8.45 | 10.06 | 71.73 | 8.43 | 10.27 |
| <b>17</b> | C <sub>23</sub> H <sub>31</sub> N <sub>3</sub> O <sub>3</sub>                                       | 69.49      | 7.86 | 10.57 | 69.47 | 7.92 | 10.38 |
| <b>18</b> | C <sub>22</sub> H <sub>29</sub> N <sub>3</sub> O <sub>3</sub> · 0.95 H <sub>2</sub> O               | 65.96      | 7.77 | 10.49 | 66.25 | 7.67 | 10.13 |
| <b>20</b> | C <sub>30</sub> H <sub>36</sub> N <sub>2</sub> O <sub>4</sub> · 1.5 H <sub>2</sub> O                | 69.88      | 7.62 | 5.43  | 69.53 | 7.37 | 5.10  |
| <b>21</b> | C <sub>29</sub> H <sub>34</sub> N <sub>2</sub> O <sub>5</sub> · 0.5 CH <sub>2</sub> Cl <sub>2</sub> | 66.06      | 6.58 | 5.21  | 66.20 | 6.43 | 5.17  |
| <b>22</b> | C <sub>29</sub> H <sub>33</sub> ClN <sub>2</sub> O <sub>4</sub> · 1 CH <sub>3</sub> OH              | 66.59      | 6.89 | 5.18  | 66.85 | 6.62 | 4.91  |
| <b>23</b> | C <sub>29</sub> H <sub>33</sub> FN <sub>2</sub> O <sub>4</sub> · 0.45 CH <sub>3</sub> OH            | 69.77      | 6.92 | 5.53  | 69.68 | 6.79 | 5.57  |

**Table S1:** Elemental analysis data.

## HPLC trace for compound 22

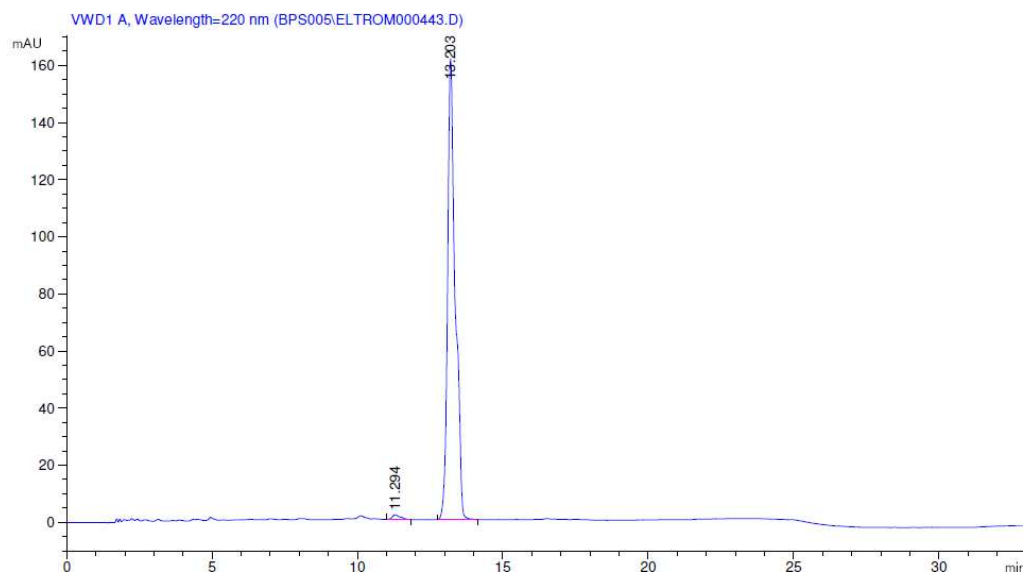

Signal 1: VWD1 A, Wavelength=220 nm

| Peak #   | RetTime [min] | Type | Width [min] | Area mAU *s | Height [mAU] | Area %  |
|----------|---------------|------|-------------|-------------|--------------|---------|
| 1        | 11.294        | BB   | 0.2786      | 33.87679    | 1.70337      | 1.1300  |
| 2        | 13.203        | BB   | 0.2636      | 2964.20068  | 161.49048    | 98.8700 |
| Totals : |               |      |             | 2998.07747  | 163.19384    |         |

a) Active site volume fluctuations along the three replicas of MD Simulations

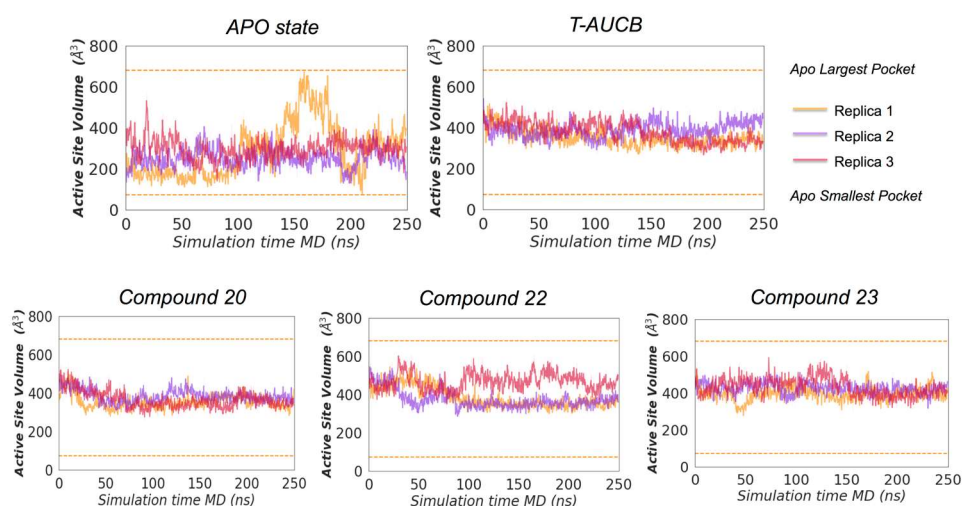

b) Active site volume distributions

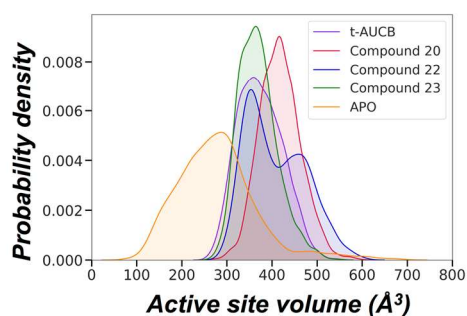

c) Points inclusion spheres of radius 6 Å used for POVME calculations

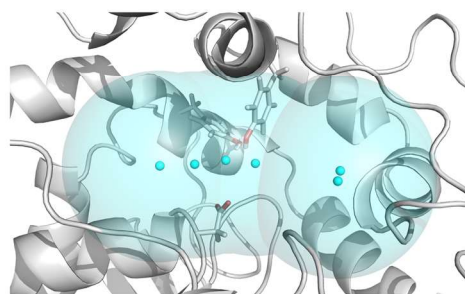

d) Molecular representations of small and large volumes sampled in the apo state

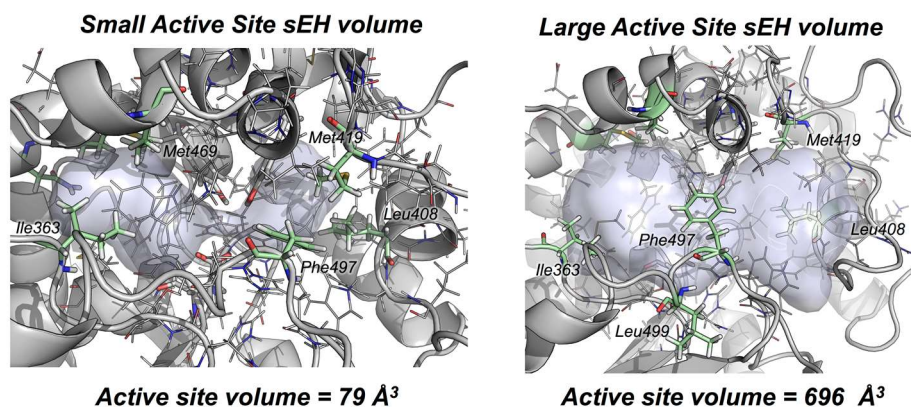

**Figure S1:** a) Representation of the active site volume fluctuations in the different MD replicas and systems considered calculated using the using the POCKET Volume Measurer.<sup>1</sup> b) Probability density of the active site volumes for the apo state simulations (orange), and inhibitor bound simulations: *t*-AUCB (purple), **20** (red), **22** (blue), and **23** (green). c) Visualization of the 6 Å inclusion spheres used for POVME active site volume calculations. d) Representative MD snapshots displaying either small (left panel) or large active site sEH volumes (right panel) are shown. The most important residues affecting the volume are shown in sticks and labelled.

*Root-mean-square fluctuation (RMSF) C-terminal sEH*

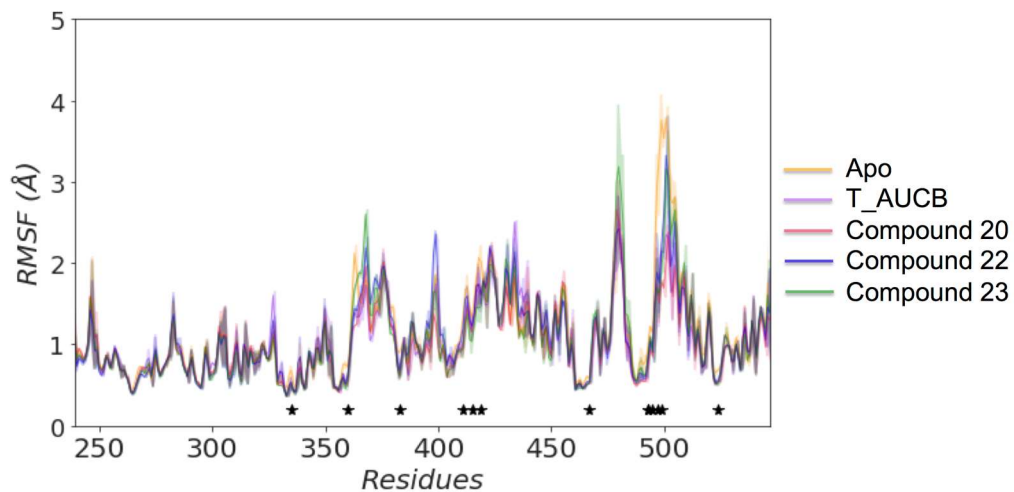

**Figure S2:** Root Mean Square Fluctuation (RMSF, in Å) of the C-terminal region of sEH either in the apo (orange line), *t*-AUCB bound (purple), compound **20** (red), **22** (blue), and **23** (green). Stars mark the sEH residues that occupy the active site region.

Non-covalent interactions between the inhibitors and the active site residues of sEH

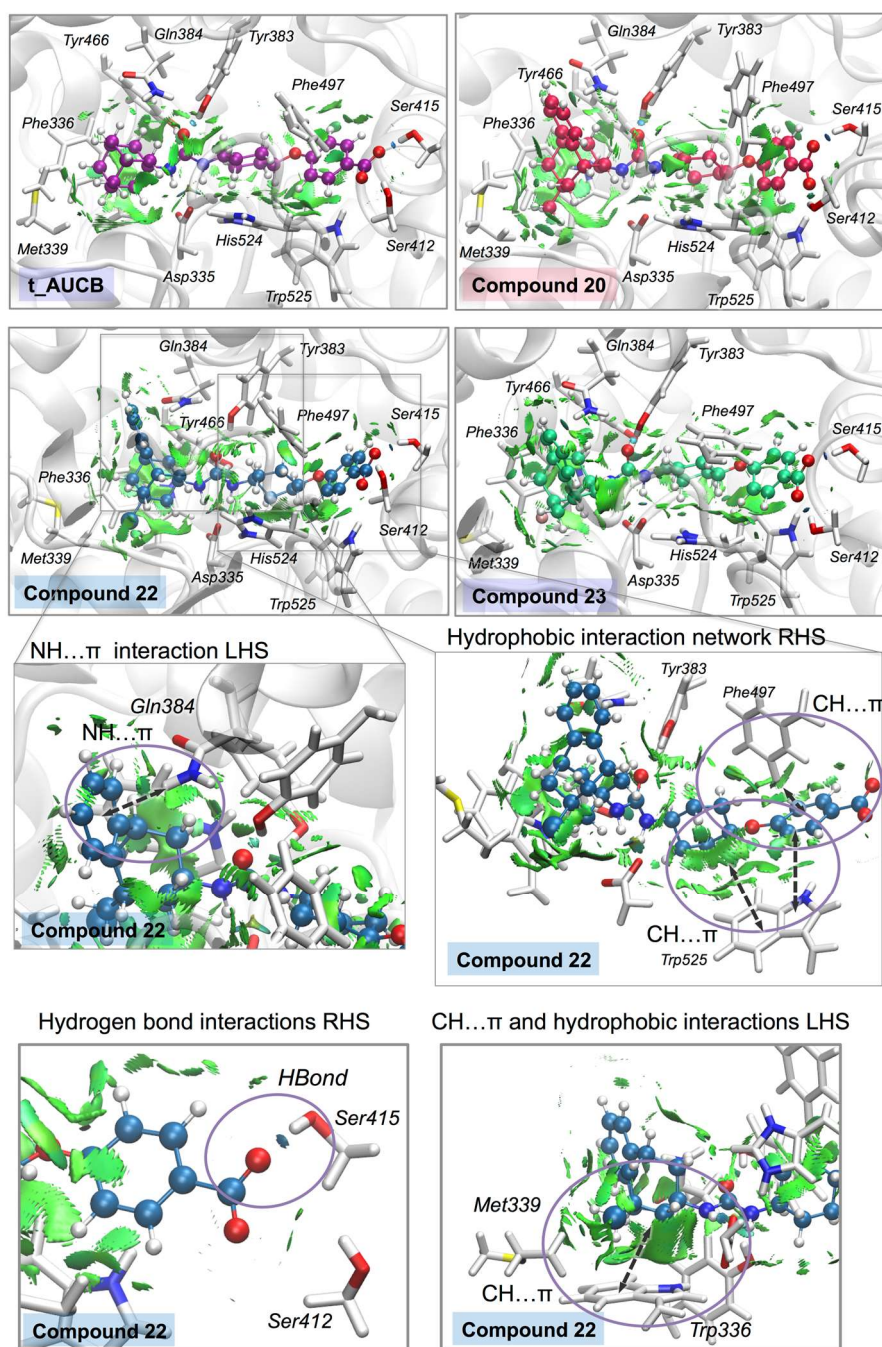

**Figure S3:** Representation of the noncovalent interactions (computed with NCIPLOT) at the active site of soluble epoxide hydrolase active site in the presence of compounds *t*-AUCB, **20**, **22**, and **23**. The weak interactions are shown as green surfaces, hydrogen-bonds are depicted in blue, and repulsive interactions in red. The interaction surface of the NH... $\pi$  interaction between the side chain of Gln384 and the aromatic ring of the benzohomoadamantane scaffold of compound **22** is highlighted. The network of hydrogen bonds, hydrophobic and CH... $\pi$  interactions in both LHS and RHS pockets in the presence of compound **22** are depicted. The non-covalent interactions are calculated for the representative structures of the most populated cluster obtained from the MD simulations.

## Analysis of active site water molecules in MD simulations

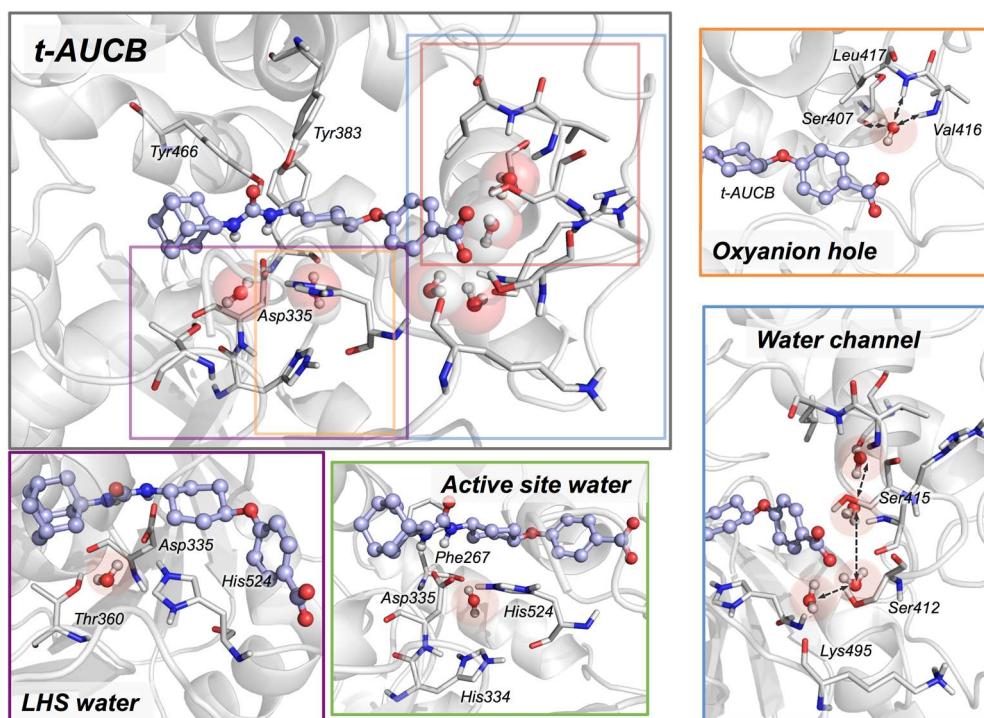

**Figure S4:** Representative MD snapshots displaying the water occupation in the RHS pocket in the presence of *t*-AUCB, oxyanion hole region, as well as the network of water channels are additionally provided. Representative MD snapshots showing the positioning of two water molecules: one occupying the RHS of the catalytic Asp335 (green panel), while the other one is positioned on the LHS (purple panel).

### a) Water occupation in the sEH active site

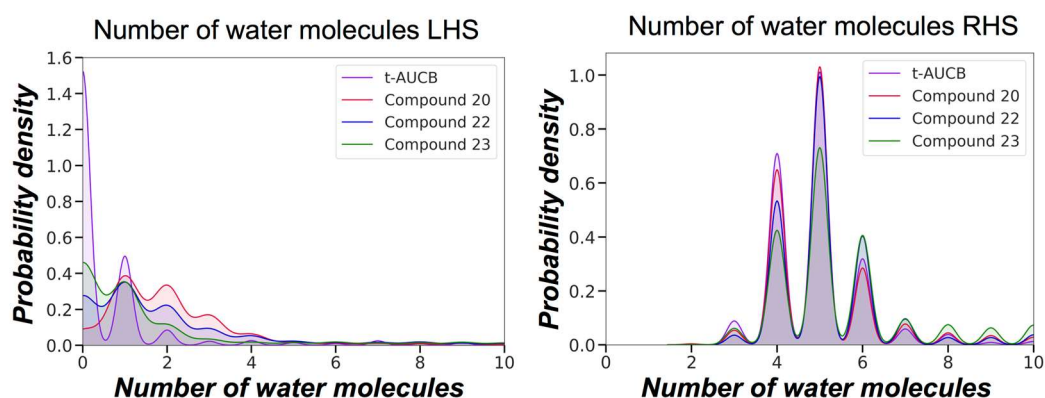

### b) Molecular representation of water distribution for 20, 22, and 23

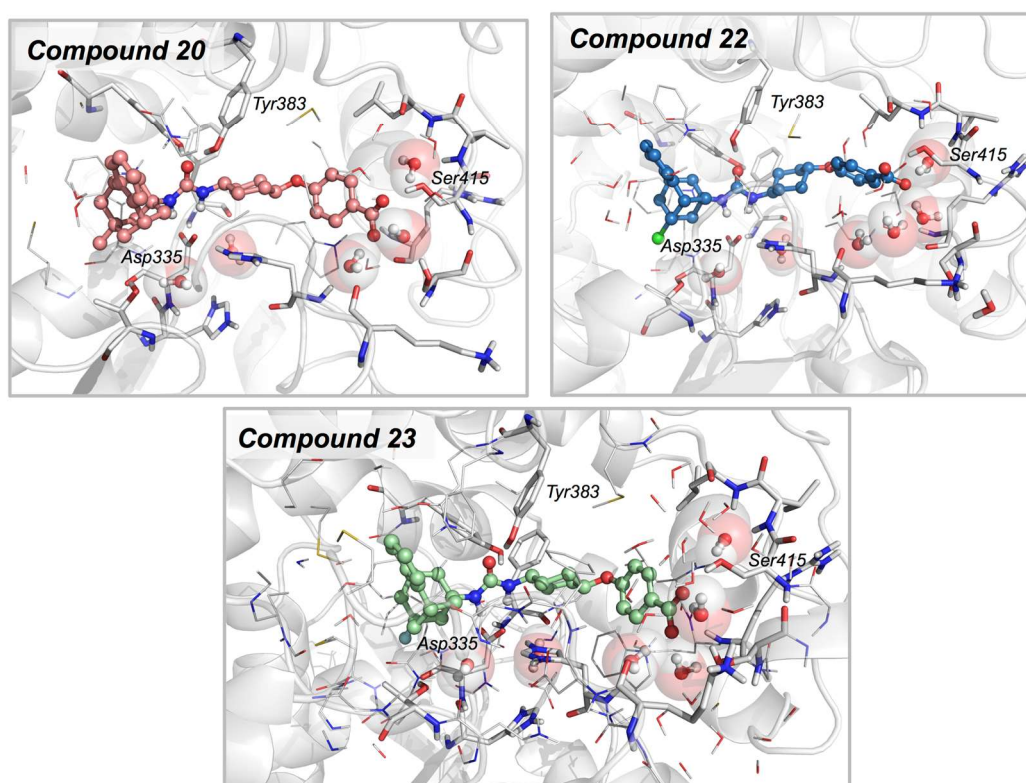

**Figure S5:** Representation of the normalized kernel density plot of the water distribution in the active site LHS and RHS pocket in the presence of *t*-AUCB (purple), **20** (red), **22** (blue), and **23** (green). We monitored the presence of water molecules through visual inspection of MD trajectories and using the *watershell* function of cpptraj MD analysis program.<sup>2</sup> Using *watershell*, we calculated the number of water molecules in the first solvation shell (using a distance cutoff of 3.4 Å) for both RHS (carboxylate group) and LHS (adamantane) pockets along the MD simulations. The average number of water molecules in the RHS pocket is  $5.0 \pm 1.4$  (*t*-AUCB),  $5.3 \pm 1.8$  (compound **20**),  $5.6 \pm 2.1$  (compound **22**), and  $6.1 \pm 2.5$  (compound **23**), respectively. The average number of water molecules in the LHS pocket is  $1.0 \pm 2.6$  (*t*-AUCB),  $2.8 \pm 3.6$  (compound **20**),  $2.7 \pm 3.9$  (compound **22**), and  $2.5 \pm 4.5$  (compound **23**).

a) Rotation of the (benzohomo)adamantane moiety in the left-hand-side pocket of the sEH active site along the MD simulations

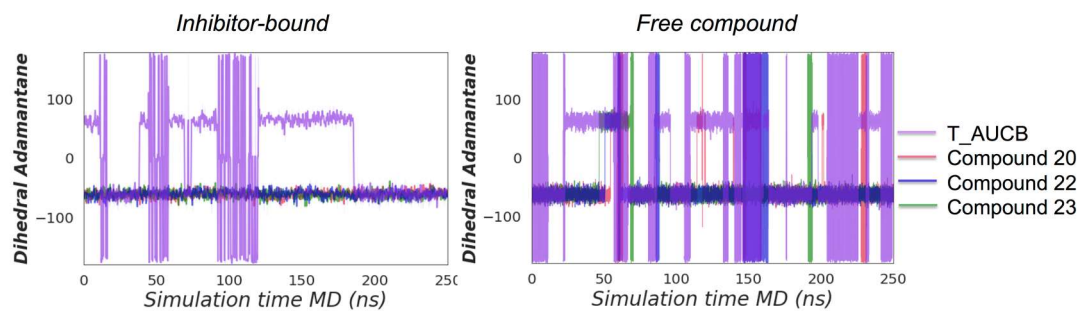

b) Representative dihedral angle that describes the rotation of the adamantane moiety

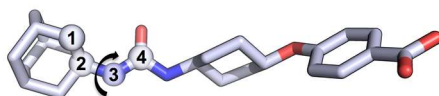

**Figure S6:** a) Plot of the dihedral angle that describes the rotation of the benzohomoadamantane moiety in the left-hand-side pocket of the sEH active site along the MD simulations (left) and when the compounds are free in the solvent (right). *t*-AUCB is shown in purple, compound **20** in red, compound **22** in blue, and compound **23** in green. b) Molecular representation of the dihedral angle used to monitor the rotation of the (benzohomo)adamantane scaffold.



a. Loop 493-500 rearrangements aMD

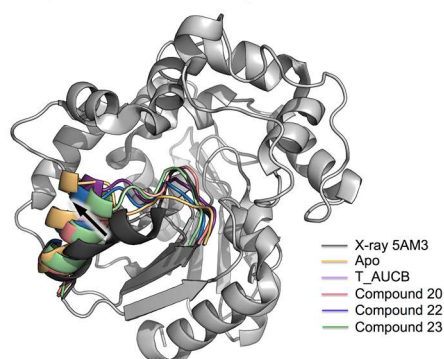

b. Loop 493-500 rearrangement: WT vs L499A

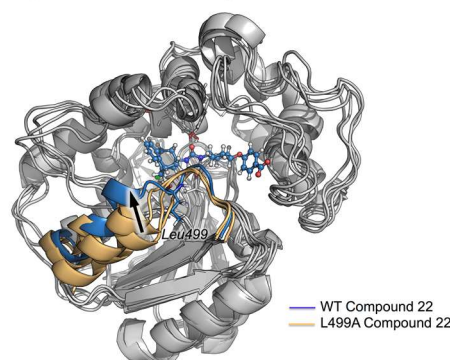

**Figure S7:** a) Overlay of the X-ray (in black), and representative snapshot from the apo state aMD simulations (yellow structure), and inhibitor-bound: *t*-AUCB (purple), and compounds **20** (red), **22** (blue), and **23** (green) simulations. The aMD parameters are calculated as described previously.<sup>3</sup> For *t*-AUCB, the boost potential applied to all dihedrals of the system is obtained from an energy threshold of 8101.08 kcal/mol and an alpha parameter value of 382.90 while a boost potential corresponding to an energy threshold of -217851.72 kcal/mol and alpha parameter of 12217.28 were applied to all atoms of the system. For **20**, the boost potential applied to all dihedrals of the system is obtained from an energy threshold of 8106.07 kcal/mol and an alpha parameter value of 382.90 while a boost potential corresponding to an energy threshold of -217635.12 kcal/mol and alpha parameter of 12218.88 were applied to all atoms of the system. For **22**, the boost potential applied to all dihedrals of the system is obtained from an energy threshold of 8101.1 kcal/mol and an alpha parameter value of 382.90 while a boost potential corresponding to an energy threshold of -217682.60 kcal/mol and alpha parameter of 12218.40 were applied to all atoms of the system. For **23**, the boost potential applied to all dihedrals of the system is obtained from an energy threshold of 8114.27 kcal/mol and an alpha parameter value of 382.90 while a boost potential corresponding to an energy threshold of -217735.60 kcal/mol and alpha parameter of 12218.40 were applied to all atoms of the system. B) Overlay of representative conventional MD snapshots for WT sEH (in blue), and three independent replicas of L499A variant (in yellow) showing the displacement of the loop 493-400 region.

| Time   | ID      | Total Concentration (ng/mL) | Mean (ng/mL) | SD (ng/mL) |
|--------|---------|-----------------------------|--------------|------------|
| 0 h    | Mouse 1 | 0                           | 0            | 0          |
|        | Mouse2  | 0                           |              |            |
|        | Mouse3  | 0                           |              |            |
| 0.25 h | Mouse 1 | 787                         | 767.5        | 27.6       |
|        | Mouse2  | 5400 <sup>a</sup>           |              |            |
|        | Mouse3  | 748                         |              |            |
| 0.5 h  | Mouse 1 | 1470                        | 1610.0       | 475.7      |
|        | Mouse2  | 2140                        |              |            |
|        | Mouse3  | 1220                        |              |            |
| 1 h    | Mouse 1 | 1000                        | 970.3        | 345.5      |
|        | Mouse2  | 1300                        |              |            |
|        | Mouse3  | 611                         |              |            |
| 2 h    | Mouse 1 | 475                         | 397.3        | 112.8      |
|        | Mouse2  | 449                         |              |            |
|        | Mouse3  | 268                         |              |            |
| 4 h    | Mouse 1 | 0                           | 51.9         | 45.4       |
|        | Mouse2  | 71.3                        |              |            |
|        | Mouse3  | 84.3                        |              |            |
| 6 h    | Mouse 1 | 21.7                        | 37.3         | 14.3       |
|        | Mouse2  | 40.2                        |              |            |
|        | Mouse3  | 49.9                        |              |            |
| 24 h   | Mouse 1 | 0                           | 0            | 0          |
|        | Mouse2  | 0                           |              |            |
|        | Mouse3  | 0                           |              |            |

**Table S2:** Mean of concentrations of **20** in mouse plasma at different times after ip administration at 3 mg/Kg. <sup>a</sup>This mouse was excluded for mean and SD calculations because it was considered as a significant outlier P<0.05.

| Time   | ID      | Total Concentration (ng/mL) | Mean (ng/mL) | SD (ng/mL) |
|--------|---------|-----------------------------|--------------|------------|
| 0 h    | Mouse 1 | 0                           | 0            | 0          |
|        | Mouse2  | 0                           |              |            |
|        | Mouse3  | 0                           |              |            |
| 0.25 h | Mouse 1 | 151                         | 354.7        | 241.9      |
|        | Mouse2  | 291                         |              |            |
|        | Mouse3  | 622                         |              |            |
| 0.5 h  | Mouse 1 | 1350                        | 1616.7       | 325.9      |
|        | Mouse2  | 1520                        |              |            |
|        | Mouse3  | 1980                        |              |            |
| 1 h    | Mouse 1 | 600                         | 1446.7       | 1063.3     |
|        | Mouse2  | 1100                        |              |            |
|        | Mouse3  | 2640                        |              |            |
| 2 h    | Mouse 1 | 2440.0                      | 3583.3       | 1089.9     |
|        | Mouse2  | 2640.0                      |              |            |
|        | Mouse3  | 5670.0                      |              |            |
| 4 h    | Mouse 1 | 1240.0                      | 1516.7       | 387.9      |
|        | Mouse2  | 1960.0                      |              |            |
|        | Mouse3  | 1350.0                      |              |            |
| 6 h    | Mouse 1 | 1160                        | 1141.3       | 398.3      |
|        | Mouse2  | 734.0                       |              |            |
|        | Mouse3  | 1530                        |              |            |
| 24 h   | Mouse 1 | 181.0                       | 104.6        | 71.0       |
|        | Mouse2  | 40.6                        |              |            |
|        | Mouse3  | 92.3                        |              |            |

**Table S3:** Mean of concentrations of **22** in mouse plasma at different times after ip administration at 3 mg/kg.

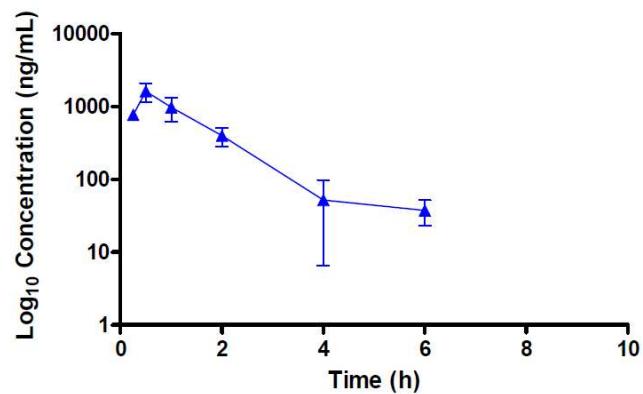

**Figure S8:** Plasma concentration (scale log 10) vs time for ip administration at 3 mg/kg of compound **20**.

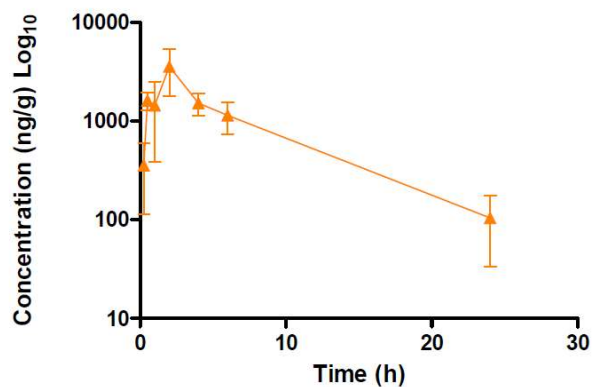

**Figure S9:** Plasma concentration (scale log 10) vs time for ip administration at 3 mg/kg of compound **22**.

| Control Group                              | Sample 1 | Sample 2 | Sample 3 | Sample 4 | Sample 5 |
|--------------------------------------------|----------|----------|----------|----------|----------|
| <i>Parenchymal atrophy</i>                 | 0        | 0        | 0        | 0        | 0        |
| <i>Vacuolar degeneration of cells</i>      | 0        | 0        | 0        | 0        | 0        |
| <i>Edema</i>                               | 0        | 0        | 0        | 0        | 0        |
| <i>Hemorrhage</i>                          | 0        | 0        | 0        | 0        | 0        |
| <i>Mononuclear inflammatory cells</i>      | 0        | 0        | 0        | 0        | 0        |
| <i>Polimorfonuclear inflammatory cells</i> | 0        | 0        | 0        | 0        | 0        |
| <i>Necrosis</i>                            | 0        | 0        | 0        | 0        | 0        |
| <i>Total</i>                               | 0        | 0        | 0        | 0        | 0        |

**Table S4:** Histologic scoring of pancreatic tissues of control group.

| Cerulein Group                             | Sample 1 | Sample 2 | Sample 3 | Sample 4 | Sample 5 |
|--------------------------------------------|----------|----------|----------|----------|----------|
| <i>Parenchymal atrophy</i>                 | 2        | 2        | 3        | 1        | 2        |
| <i>Vacuolar degeneration of cells</i>      | 1        | 2        | 2        | 1        | 2        |
| <i>Edema</i>                               | 2        | 1        | 2        | 2        | 2        |
| <i>Hemorrhage</i>                          | 0        | 0        | 0        | 0        | 0        |
| <i>Mononuclear inflammatory cells</i>      | 1        | 1        | 2        | 1        | 1        |
| <i>Polimorfonuclear inflammatory cells</i> | 1        | 2        | 3        | 1        | 2        |
| <i>Necrosis</i>                            | 1        | 0        | 2        | 1        | 0        |
| <i>Total</i>                               | 8        | 8        | 14       | 7        | 9        |

**Table S5:** Histologic scoring of pancreatic tissues of mice treated with cerulein.

| Cerulein + 22 (0.1 mg/Kg)                  | Sample 1 | Sample 2 | Sample 3 | Sample 4 | Sample 5 |
|--------------------------------------------|----------|----------|----------|----------|----------|
| <i>Parenchymal atrophy</i>                 | 3        | 1        | 0        | 1        | 3        |
| <i>Vacuolar degeneration of cells</i>      | 1        | 0        | 0        | 0        | 2        |
| <i>Edema</i>                               | 2        | 3        | 0        | 1        | 2        |
| <i>Hemorrhage</i>                          | 0        | 0        | 0        | 0        | 0        |
| <i>Mononuclear inflammatory cells</i>      | 1        | 0        | 0        | 0        | 0        |
| <i>Polimorfonuclear inflammatory cells</i> | 1        | 2        | 0        | 1        | 3        |
| <i>Necrosis</i>                            | 2        | 1        | 0        | 0        | 0        |
| <i>Total</i>                               | 10       | 7        | 0        | 3        | 11       |

**Table S6:** Histologic scoring of pancreatic tissues of mice treated with cerulein and 22 at 0.1 mg/kg.

| Cerulein + 22 (0.3 mg/Kg)                  | Sample 1 | Sample 2 | Sample 3 | Sample 4 | Sample 5 |
|--------------------------------------------|----------|----------|----------|----------|----------|
| <i>Parenchymal atrophy</i>                 | 1        | 0        | 1        | 1        | 2        |
| <i>Vacuolar degeneration of cells</i>      | 0        | 0        | 1        | 0        | 1        |
| <i>Edema</i>                               | 1        | 1        | 1        | 1        | 0        |
| <i>Hemorrhage</i>                          | 0        | 0        | 0        | 0        | 0        |
| <i>Mononuclear inflammatory cells</i>      | 0        | 0        | 0        | 0        | 0        |
| <i>Polimorfonuclear inflammatory cells</i> | 1        | 0        | 1        | 1        | 1        |
| <i>Necrosis</i>                            | 0        | 0        | 0        | 0        | 0        |
| <i>Total</i>                               | 3        | 1        | 4        | 3        | 4        |

**Table S7:** Histologic scoring of pancreatic tissues of mice treated with cerulein and 22 at 0.3 mg/kg.

## REFERENCES

- 1- Durrant, J. D.; Votapka, L.; Sorensen, J.; Amaro, R. E. POVME 2.0: An enhanced tool for determining pocket shape and volume characteristics. *J. Chem. Theory Comput.* **2014**, *10*, 5047–5056.
- 2- Roe, D. R.; Cheatham, T. E., III. PTRAJ and CPPTRAJ: Software for processing and analysis of molecular dynamics trajectory data. *J. Chem. Theory Comput.* **2013**, *9*, 3084–3095.
- 3- Hamelberg, D.; de Oliveira, C. A. F.; McCammon, J. A. Sampling of slow diffusive conformational transitions with accelerated molecular dynamics. *J. Chem. Phys.* **2007**, *127*, 155102.
